# Supplementary material for: Occurrence and timely management of problems requiring prompt intervention among Indigenous compared with non-Indigenous Australian palliative care patients: a multijurisdictional cohort study
Source: HighWire-hosted journal article supplement (doi:10.1136/bmjopen-2020-042268), 2021-03-01
Supplement: bmjopen-2020-042268supp001_data_supplement.pdf [file bmjopen-2020-042268supp001_data_supplement.pdf]

**Supplemental Tables:**

Occurrence and timely management of problems requiring prompt intervention among Indigenous compared with non-Indigenous Australian palliative care patients: a multi-jurisdictional cohort study

John A Woods, Judith M Katzenellenbogen, Kevin Murray, Claire E Johnson and Sandra C Thompson

**Supplemental Table 1: Missing values, by patient group and variable**

|                                                                                    | Variable          | Observations missing                  | Observations not missing | Percent Missing |
|------------------------------------------------------------------------------------|-------------------|---------------------------------------|--------------------------|-----------------|
| <b>Variables ascertained for each patient at entry to care by a service</b>        |                   |                                       |                          |                 |
| <b>All patients</b>                                                                | <b>Sex</b>        | 64                                    | 139,492                  | 0.0             |
|                                                                                    | <b>Diagnosis</b>  | 1,733                                 | 137,823                  | 1.2             |
|                                                                                    | <b>Remoteness</b> | 2,137                                 | 137,419                  | 1.5             |
|                                                                                    |                   | Data complete for 97.3% of patients   |                          |                 |
| <b>Indigenous patients</b>                                                         | <b>Sex</b>        | 3                                     | 1,499                    | 0.2             |
|                                                                                    | <b>Diagnosis</b>  | 24                                    | 1,478                    | 1.6             |
|                                                                                    | <b>Remoteness</b> | 26                                    | 1,476                    | 1.7             |
|                                                                                    |                   | Data complete for 96.5% of patients   |                          |                 |
| <b>Non-indigenous patients</b>                                                     | <b>Sex</b>        | 61                                    | 137,993                  | 0.0             |
|                                                                                    | <b>Diagnosis</b>  | 1,709                                 | 136,345                  | 1.2             |
|                                                                                    | <b>Remoteness</b> | 2,111                                 | 135,943                  | 1.5             |
|                                                                                    |                   | Data complete for 97.3% of patients   |                          |                 |
| <b>Variables ascertained at commencement of each episode of care</b>               |                   |                                       |                          |                 |
| <b>All patients</b>                                                                | <b>Age</b>        | 128                                   | 193,914                  | 0.1             |
|                                                                                    | <b>Setting</b>    | 0                                     | 194,042                  | 0.0             |
|                                                                                    |                   | Data complete for 99.9% of patients   |                          |                 |
| <b>Indigenous patients</b>                                                         | <b>Age</b>        | 3                                     | 2,255                    | 0.1             |
|                                                                                    | <b>Setting</b>    | 0                                     | 2,258                    | 0.0             |
|                                                                                    |                   | Data complete for 99.9% of patients   |                          |                 |
| <b>Non-indigenous patients</b>                                                     | <b>Age</b>        | 125                                   | 191,659                  | 0.1             |
|                                                                                    | <b>Setting</b>    | 0                                     | 2,258                    | 0.0             |
|                                                                                    |                   | Data complete for 99.9% of patients   |                          |                 |
| <b>Variables ascertained at commencement of each clinical phase (i) All phases</b> |                   |                                       |                          |                 |
| <b>All patients</b>                                                                | <b>Phase type</b> | 49                                    | 448,799                  | <0.1            |
|                                                                                    |                   | Data complete for ~100.0% of patients |                          |                 |
| <b>Indigenous patients</b>                                                         | <b>Phase type</b> | 0                                     | 4878                     | 0.0             |
|                                                                                    |                   | Data complete for 100.0% of patients  |                          |                 |
| <b>Non-indigenous patients</b>                                                     | <b>Phase type</b> | 49                                    | 443,921                  | <0.1            |
|                                                                                    |                   | Data complete for ~100.0% of patients |                          |                 |

**Variables ascertained at commencement of each clinical phase (ii) Unstable phases only**

|                                |                           |       |        |                                     |
|--------------------------------|---------------------------|-------|--------|-------------------------------------|
| <b>All patients</b>            | <b>Start date</b>         | 0     | 97,932 | 0.0                                 |
|                                | <b>End date</b>           | 0     | 97,932 | 0.0                                 |
|                                | <b>SAS Pain score</b>     | 6,277 | 91,655 | 6.4                                 |
|                                | <b>SAS Nausea score</b>   | 6,789 | 91,143 | 6.9                                 |
|                                | <b>SAS Breathing</b>      | 6,926 | 91,006 | 7.1                                 |
|                                | <b>SAS Bowel score</b>    | 7,361 | 90,571 | 7.5                                 |
|                                | <b>SAS Insomnia score</b> | 8,259 | 89,673 | 8.4                                 |
|                                | <b>SAS Appetite score</b> | 7,279 | 90,653 | 7.4                                 |
|                                | <b>SAS Fatigue score</b>  | 6,777 | 91,155 | 6.9                                 |
|                                | <b>AKPS</b>               | 6,144 | 91,788 | 6.3                                 |
|                                |                           |       |        | Data complete for 85.8% of patients |
| <b>Indigenous patients</b>     | <b>Start date</b>         | 0     | 1,156  | 0.0                                 |
|                                | <b>End date</b>           | 0     | 1,156  | 0.0                                 |
|                                | <b>Start date</b>         | 76    | 1,080  | 6.6                                 |
|                                | <b>End date</b>           | 79    | 1,077  | 6.8                                 |
|                                | <b>SAS Pain score</b>     | 80    | 1,076  | 6.9                                 |
|                                | <b>SAS Nausea score</b>   | 84    | 1,072  | 7.3                                 |
|                                | <b>SAS Breathing</b>      | 88    | 1,068  | 7.6                                 |
|                                | <b>SAS Bowel score</b>    | 81    | 1,075  | 7.0                                 |
|                                | <b>SAS Insomnia score</b> | 82    | 1,074  | 7.1                                 |
|                                | <b>SAS Appetite score</b> | 103   | 1,053  | 8.9                                 |
|                                |                           |       |        | Data complete for 84.3% of patients |
| <b>Non-indigenous patients</b> | <b>Start date</b>         | 0     | 96,776 | 0.0                                 |
|                                | <b>End date</b>           | 0     | 96,776 | 0.0                                 |
|                                | <b>Start date</b>         | 6,201 | 90,575 | 6.4                                 |
|                                | <b>End date</b>           | 6,710 | 90,066 | 6.9                                 |
|                                | <b>SAS Pain score</b>     | 6,846 | 89,930 | 7.1                                 |
|                                | <b>SAS Nausea score</b>   | 7,277 | 89,499 | 7.5                                 |
|                                | <b>SAS Breathing</b>      | 8,171 | 88,605 | 8.4                                 |
|                                | <b>SAS Bowel score</b>    | 7,198 | 89,578 | 7.4                                 |
|                                | <b>SAS Insomnia score</b> | 6,695 | 90,081 | 6.9                                 |
|                                | <b>SAS Appetite score</b> | 6,041 | 90,735 | 6.2                                 |
|                                |                           |       |        | Data complete for 85.8% of patients |

**Supplemental Table 2:****Evidence of similar structure of Indigenous and non-Indigenous patients' journeys of care****2a. Episodes and phases within a patient's journey of care, by Indigenous identifier**

|                                                                                             | Indigenous          | Non-Indigenous       |
|---------------------------------------------------------------------------------------------|---------------------|----------------------|
| Number of episodes & phases within a patient's journey of care, mean (median, IQR, range)   |                     |                      |
| Episodes per patient                                                                        | 1.50 (1, 1–2, 1–16) | 1.39 (1, 1–1, 1–44)  |
| Phases per patient                                                                          | 3.25 (2, 1–4, 1–31) | 3.22 (2, 1–4, 1–145) |
| Phases per episode                                                                          | 2.16 (2, 1–2, 1–31) | 2.31 (2, 1–3, 1–139) |
| Number of phases of each type within a patient's journey of care, mean (median, IQR, range) |                     |                      |
| Phase type                                                                                  |                     |                      |
| Stable                                                                                      | 1.00 (1, 0–1, 1–14) | 0.99 (1, 0–1, 1–71)  |
| Unstable                                                                                    | 0.77 (0, 0–1, 1–11) | 0.70 (0, 0–1, 1–32)  |
| Deteriorating                                                                               | 1.04 (1, 0–1, 1–13) | 1.08 (1, 0–1, 1–71)  |
| Terminal                                                                                    | 0.43 (0, 0–1, 1–3)  | 0.45 (0, 0–1, 1–13)  |

**2b. Phase types immediately preceding an unstable phase: Number and percentage of all phases**

| Preceding Phase type | Phases of non-Indigenous patients | Phases of Indigenous patients | Total           |
|----------------------|-----------------------------------|-------------------------------|-----------------|
| Nil (First phases)   | 58,260<br>60.2%                   | 740<br>64.0%                  | 59,000<br>60.3% |
| Stable               | 25,738<br>26.6%                   | 286<br>24.7%                  | 26,024<br>26.6% |
| Deteriorating        | 12,290<br>12.7%                   | 127<br>11.0%                  | 12,417<br>12.7% |
| Terminal             | 258<br>0.3%                       | 3<br>0.3%                     | 261<br>0.3%     |
| Missing phase record | 230<br>0.2%                       | 0<br>0.0%                     | 230<br>0.2%     |
| Total                | 96,776<br>100%                    | 1,156<br>100%                 | 97,932<br>100%  |

**2c. Phase types immediately following an unstable phase: Number and percentage of all phases**

| <b>Following Phase type</b>                     | <b>Phases of non-Indigenous patients</b> | <b>Phases of Indigenous patients</b> | <b>Total</b>     |
|-------------------------------------------------|------------------------------------------|--------------------------------------|------------------|
| Stable                                          | 41,431<br>42.8%                          | 515<br>44.6%                         | 41,946<br>42.8%  |
| Deteriorating                                   | 33,406<br>34.5%                          | 377<br>32.6%                         | 33,783<br>34.5%  |
| Terminal                                        | 4,684<br>4.8%                            | 52<br>4.5%                           | 4,736<br>4.8%    |
| Missing phase record<br>(majority due to death) | 17255<br>17.8%                           | 212<br>18.3%                         | 17467<br>17.8%   |
| Total                                           | 96,776<br>100.0%                         | 1,156<br>100.0%                      | 97,932<br>100.0% |
